# Supplementary material
Source: PubMed Central journal article supplement (PMC9528333)
Supplement: ASN.2022020139SupplementaryData.pdf [file ASN.2022020139SupplementaryData.pdf]

## Blocking CCL8-CCR8-Mediated Early Allograft Inflammation

### Improves Kidney Transplant Function

Anil Dangi<sup>1</sup>, Irma Husain<sup>1</sup>, Collin Z. Jordan<sup>1</sup>, Shuangjin Yu<sup>2</sup>, Naveen Natesh<sup>3</sup>, Xiling Shen<sup>3,4</sup>, Jean Kwun<sup>5,6</sup>, Xunrong Luo<sup>1,6</sup>

#### Supplemental Material

|                               |                                                                                                                                                                              |
|-------------------------------|------------------------------------------------------------------------------------------------------------------------------------------------------------------------------|
| <b>Supplemental Figures 1</b> | Violin plot depicting <i>Cc18</i> expression by various immune and non-immune cell clusters from rejection kidney allografts.                                                |
| <b>Supplemental Figures 2</b> | Identification and phenotypic characterization of kidney resident macrophages.                                                                                               |
| <b>Supplemental Figures 3</b> | Donor kidney-resident and recipient graft-infiltrating macrophages co-exist in syngeneic kidney transplant grafts on day 15 post-transplantation.                            |
| <b>Supplemental Figures 4</b> | Up-regulation of F4/80 mean fluorescent intensity (MFI) on graft-infiltrating recipient CD11b <sup>+</sup> cells post allogeneic kidney transplantation.                     |
| <b>Supplemental Figures 5</b> | UMAPs of un-transplanted kidneys or transplanted kidneys on day 15 post-transplantation (in allogeneic recipients) showing <i>Ccr8</i> expression in distinct cell clusters. |
| <b>Supplemental Figures 6</b> | Recipient serum creatinine levels at various time points post-transplantation in CT-Ig and anti-CCL8 Ab treated recipients.                                                  |
| <b>Supplemental Figures 7</b> | Anti-CCL8 treatment permits longer survival of donor kidney resident macrophages post-transplantation.                                                                       |

|                                |                                                                                                |
|--------------------------------|------------------------------------------------------------------------------------------------|
| <b>Supplemental Figures 8</b>  | Depletion of kidney resident macrophages in kidney donors.                                     |
| <b>Supplemental Figures 9</b>  | Alloantigen-specific CD4 T cell proliferation stimulated by donor kidney resident macrophages. |
| <b>Supplemental Figures 10</b> | Donor-specific alloantibodies on day 28 post-transplantation.                                  |

## Supplemental Figure 1

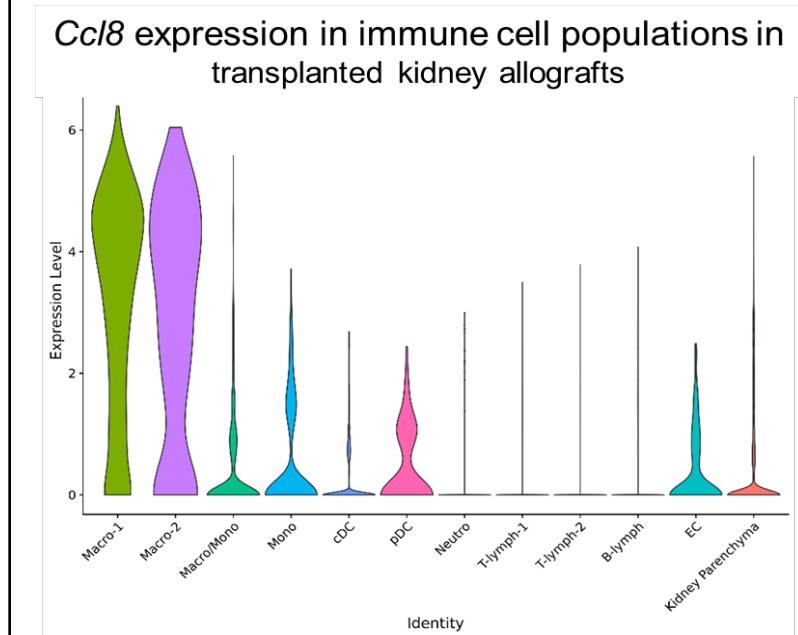

**Supplemental Figure 1.** Violin plot depicting *Ccl8* expression by various immune and non-immune cell clusters from rejection kidney allografts. Two macrophage clusters (Macro-1 and Macro-2) express the most prominent level of *Ccl8*. Samples were collected on day 15 post kidney transplantation for single cell RNA sequencing analysis. N=2.

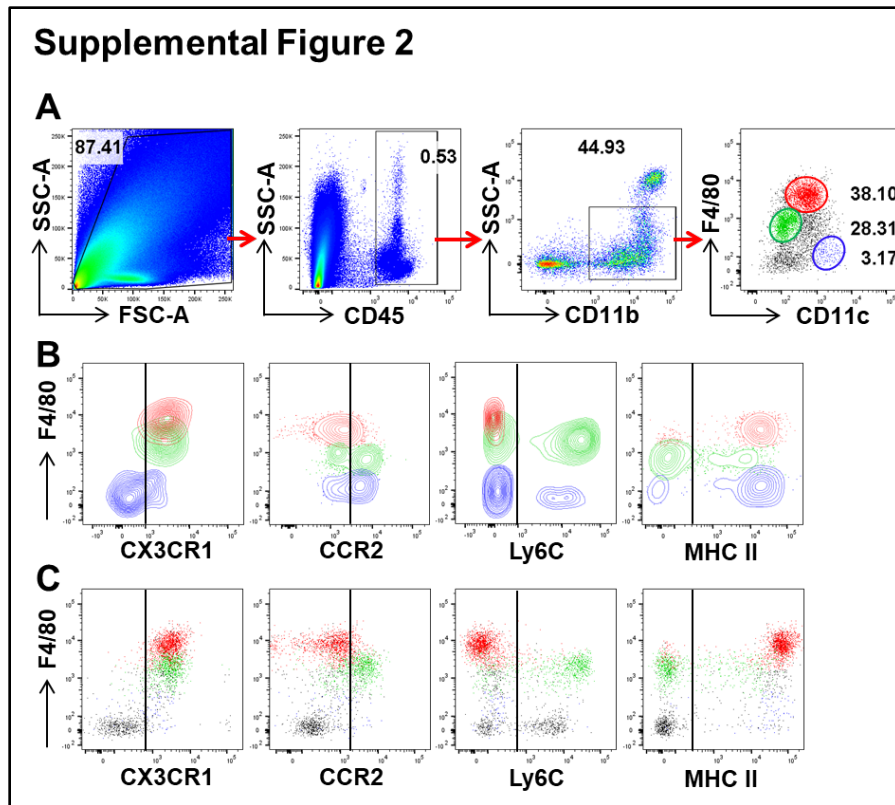

**Supplemental Figure 2.** Identification and phenotypic characterization of kidney resident macrophages. **(A)** Representative FACS plots demonstrating the gating strategy for various resident myeloid cells in naïve BALB/c kidneys. Kidney resident macrophages of the yolk-sac origin are identified as F4/80<sup>HI</sup>CD11c<sup>+</sup> cells (red). Kidney macrophages of the bone marrow origin are identified as F4/80<sup>LO</sup>CD11c<sup>-</sup> cells (green). Kidney dendritic cells are identified as F4/80<sup>-</sup>CD11c<sup>HI</sup> cells (blue). **(B)** Contour plots showing the three kidney resident myeloid cells phenotypically compared for expressions of CX<sub>3</sub>CR1, CCR2, Ly6C, and MHC-II. **(C)** Dot plots gated on all CD45<sup>+</sup>CD11b<sup>+</sup> cells as in **(A)**, showing various sub-populations phenotypically compared for expressions of CX<sub>3</sub>CR1, CCR2, Ly6C, and MHC-II. Data shown were representative of at least six naïve BALB/c kidneys.

### Supplemental Figure 3

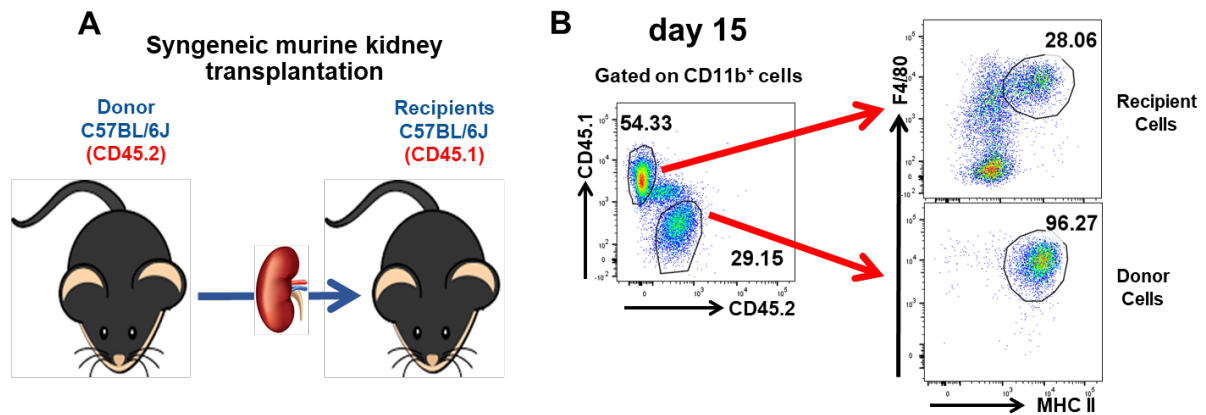

**Supplemental Figure 3.** Donor kidney-resident and recipient graft-infiltrating macrophages co-exist in syngeneic kidney transplant grafts on day 15 post-transplantation. **(A)** Cartoon of syngeneic kidney transplantation. Kidneys from CD45.2 B6 mice were transplanted into bilaterally nephrectomized CD45.1 B6 recipients. **(B)** FACS plot on left shows CD45.2<sup>+</sup> donor and CD45.1<sup>+</sup> recipient myeloid cells on day 15 post-transplantation. FACS plots on the right show F4/80<sup>Hi</sup>MHC-II<sup>Hi</sup> macrophages of both donor and recipient origin in the syngeneic kidney grafts. Data were collected from N=2 mice.

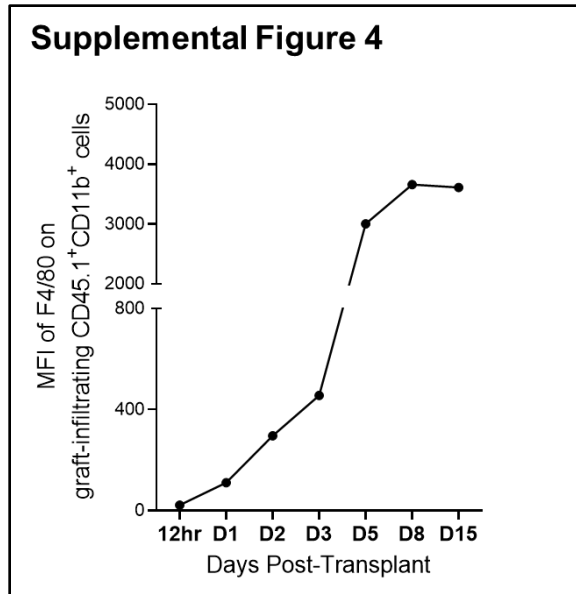

**Supplemental Figure 4.** Up-regulation of F4/80 mean fluorescent intensity (MFI) on graft-infiltrating recipient CD11b<sup>+</sup> cells post allogeneic kidney transplantation. Kidney allografts were harvested at the indicated time points and single cell preparations were stained for F4/80 for FACS analysis. F4/80 expression on total graft-infiltrating recipient CD45.1<sup>+</sup>CD11b<sup>+</sup> myeloid cells was analyzed. The MFI of F4/80 was normalized to that of the isotype control. N=2-5 per time point.

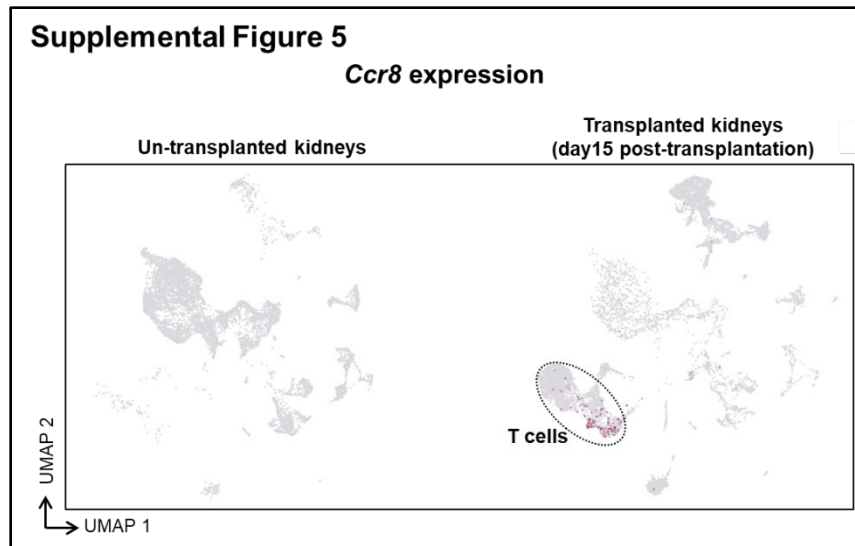

**Supplemental Figure 5.** UMAPs of un-transplanted kidneys or transplanted kidneys on day 15 post-transplantation (in allogeneic recipients) showing *Ccr8* expression in distinct cell clusters. *Ccr8* was primarily expressed by T cells in transplanted kidneys (circled). The UMAP of un-transplanted kidneys contained 8,552 cells and the UMAP of transplanted kidneys contained 9,434 cells. N=2 per group.

## Supplemental Figure 6

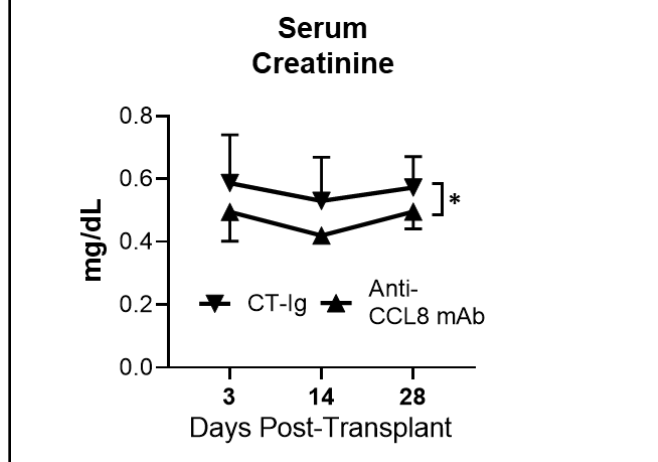

**Supplemental Figure 6.** Recipient serum creatinine levels at various time points post-transplantation in CT-Ig and anti-CCL8 Ab treated recipients. Bilateral nephrectomized B6 mice were transplanted with BALB/c kidneys. Recipients were either treated with CT-Ig or anti-CCL8 as shown in Figure 5A. Blood samples were collected on indicated days for serum creatinine measurements. N=3 for the day 3 time point; N=2-3 for the day 14 time point; N=5-9 for the day 28 time point. \* $p \leq 0.05$ , calculated using unpaired *t*-test.



## Supplemental Figure 7

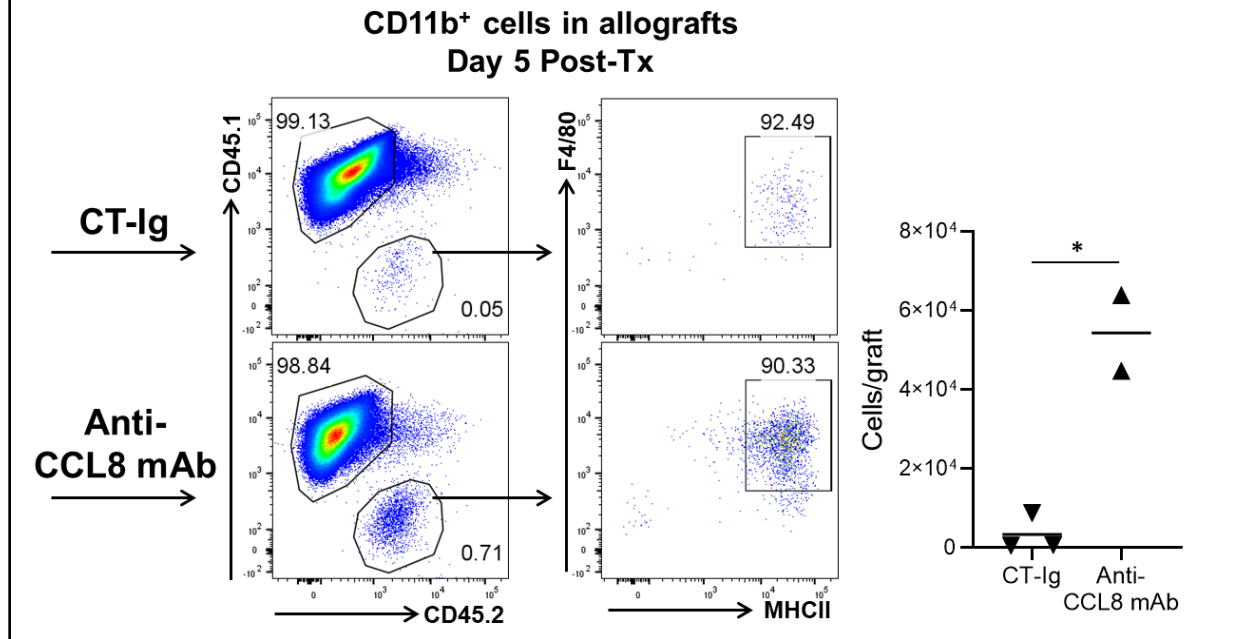

**Supplemental Figure 7.** Anti-CCL8 treatment permits longer survival of donor kidney resident macrophages post-transplantation. CD45.1 B6 mice were transplanted with CD45.2 BALB/c kidneys. Recipients were treated with either control Ig (CT-Ig) or anti-CCL8 from day -1 to +4, and sacrificed on day 5 post-transplantation. Kidney allografts were harvested and cells were analyzed by FACS. Representative FACS plots on the left show the relative proportion of CD45.1<sup>+</sup> recipient and CD45.2<sup>+</sup> donor myeloid cells in CT-Ig or anti-CCL8 treated recipients. Cells were gated on total CD11b<sup>+</sup> myeloid cells. Representative FACS plots on the right confirm the F4/80<sup>HI</sup>MHCII<sup>HI</sup> macrophage phenotype of the gated CD45.2<sup>+</sup> donor myeloid cells. Scatter plot shows the absolute number of surviving donor macrophages per kidney allograft in either CT-Ig or anti-CCL8 treated recipients on day 5 post-transplantation. N=2-3 per group. \* $p \leq 0.05$ , calculated using unpaired *t*-test.

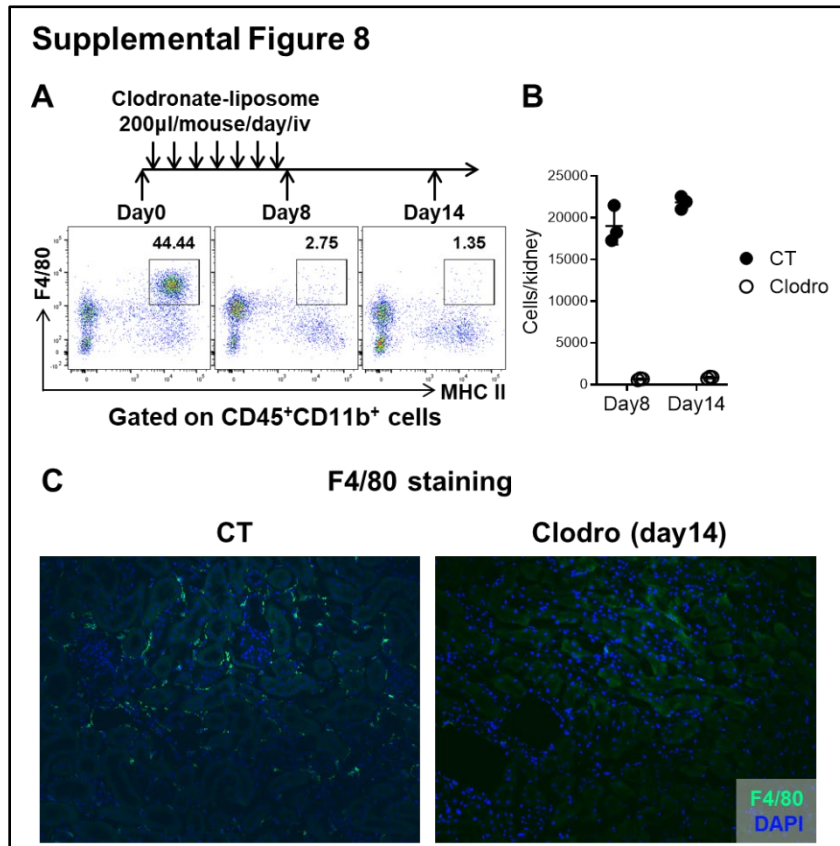

**Supplemental Figure 8.** Depletion of kidney resident macrophages in kidney donors. **(A)** Scheme of clodronate-liposome injections in BALB/c donor mice and FACS analysis of kidney resident myeloid cells on the indicated days. CD45<sup>+</sup>CD11b<sup>+</sup> myeloid cells were analyzed to identify the F4/80<sup>HI</sup>MHC-II<sup>HI</sup> kidney resident macrophage sub-population. **(B)** Scatter plot showing the absolute number of F4/80<sup>HI</sup>MHC-II<sup>HI</sup> macrophages in control PBS (CT) and clodronate (Clodro) liposome treated mice at the indicated time points. N=3 mice per group per time-point. **(C)** Immunofluorescence staining of F4/80 of kidneys from clodronate-liposome treated donor mice. Frozen sections of kidneys collected on day14 as shown in (A) were used. F4/80-specific primary and AlexaFluor-488 conjugated secondary antibodies were used to identify kidney macrophages (green). DAPI was used to stain nuclei (blue).

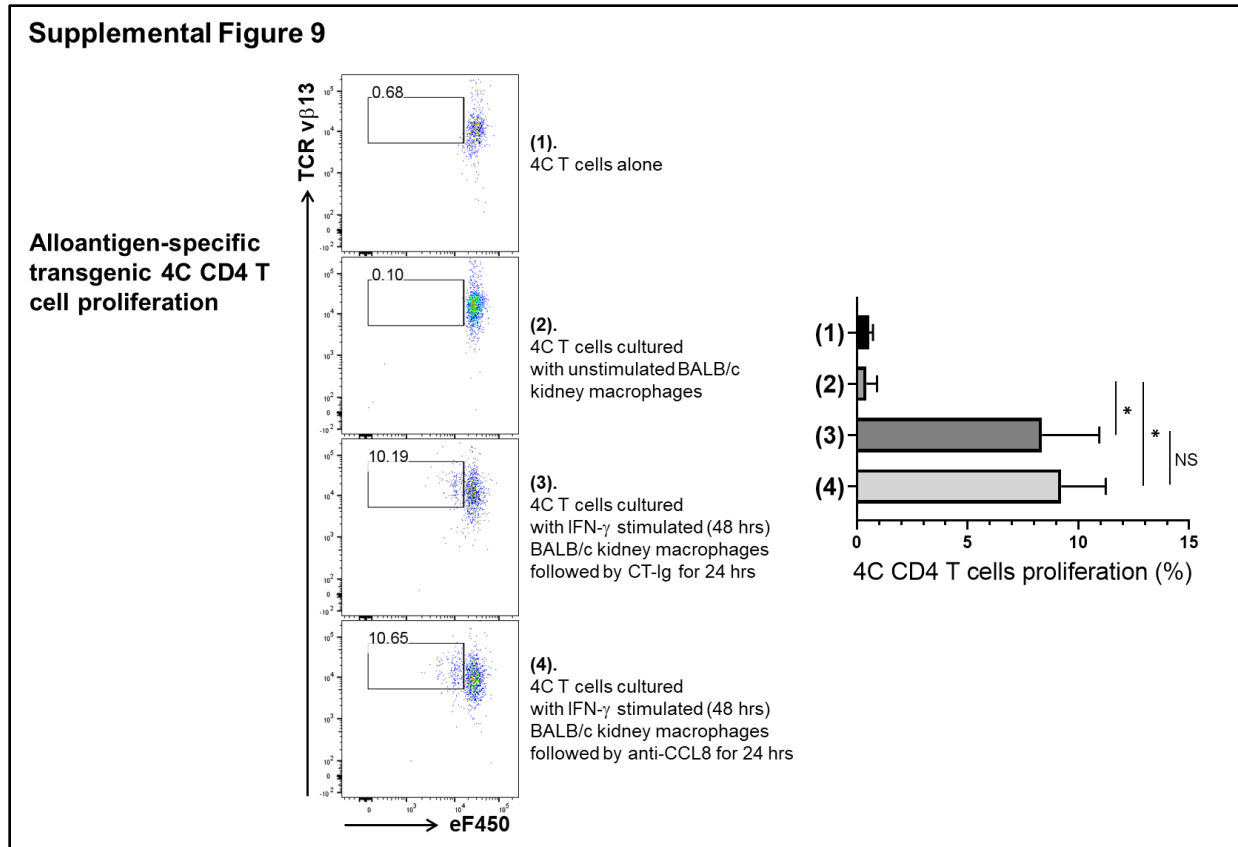

**Supplemental Figure 9.** Alloantigen-specific CD4 T cell proliferation stimulated by donor kidney resident macrophages. 4C T cells are transgenic CD4 T cells (congenically marked by CD90.1) on the B6 background that recognize the I-A<sup>d</sup> alloantigen expressed by BALB/c cells. 4C cells were labeled with the proliferation dye eF450 and cultured alone or with sorted BALB/c kidney macrophages. Co-culture conditions were: (1) 4C T cells alone; (2) 4C T cells + un-stimulated BALB/c kidney macrophages; (3) 4C T cells + IFN- $\gamma$  stimulated (48 hrs) BALB/c kidney macrophages followed by CT-Ig for 24 hrs; (4) 4C T cells + IFN- $\gamma$  stimulated (48 hrs) BALB/c kidney macrophages followed by anti-CCL8 for 24 hrs (see Methods for details). On day 7 of co-cultures, cells were harvested, stained for CD3, CD4, CD90.1, TCR  $v\beta 13^+$  and analyzed by FACS for eF450 dilution. Representative FACS plots were gated on CD3<sup>+</sup>CD4<sup>+</sup>CD90.1<sup>+</sup> cells showing proliferation of TCR  $v\beta 13^+$  4C cells by eF450 dilution in the indicated groups. Bar graph shows

percentages of proliferating 4C T cells in the indicated groups. Data were presented as mean $\pm$ SD. N=2. \* $p\leq 0.05$ , calculated using unpaired *t*-test. NS=Not Significant.

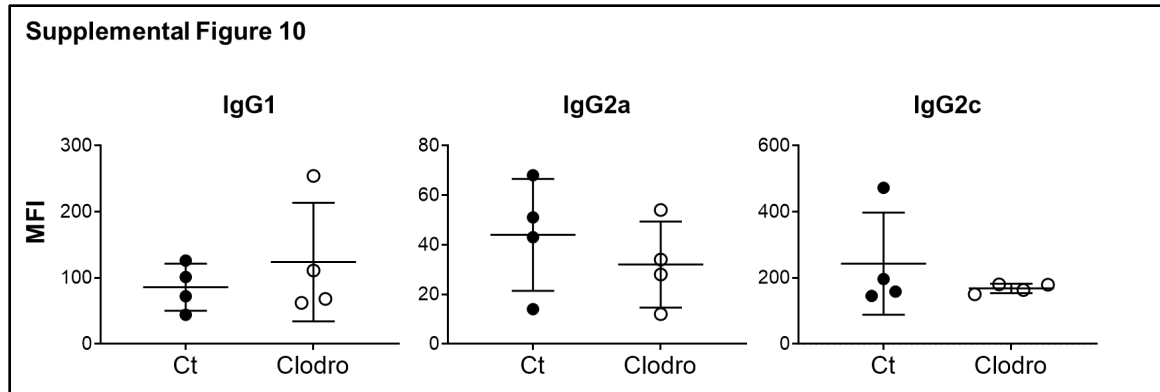

**Supplemental Figure 10.** Donor-specific alloantibodies on day 28 post-transplantation. Specific anti-donor antibodies of three IgG sub-classes (IgG1, IgG2a and IgG2c) were measured in sera from “CT” or “Clodro” recipients by flow cytometry. The mean fluorescence intensity (MFI) of each specific anti-donor antibody subclass in transplant recipients was normalized to those in naive un-transplanted mice (N=4 per group). Data are presented as mean±SD.
